# Supplementary material
Source: MDPI journal article supplement (https://www.mdpi.com/2071-1050/14/11/6864)
Supplement: s1 [file s1]

# **Extraction of polyphenolic antioxidants from red grape pomace and olive leaves: process optimization using a tailor-made tertiary deep eutectic solvent**

**Vassilis Athanasiadis \*, Dimitrios Palaogiannis, Konstantina Poulianiti, Eleni Bozinou, Stavros I. Lalas and Dimitris P. Makris**

Green Processes & Biorefinery Group, Department of Food Science & Nutrition, School of Agricultural Sciences, University of Thessaly, N. Temponera Street, 43100 Karditsa, Greece; dipaleog@med.uth.gr (D.P.); kpoulianiti@uth.gr (K.P.); empozinou@uth.gr (E.B.); slalas@uth.gr (S.I.L.); dimitrismakris@uth.gr (D.P.M.)

\* Correspondence: vaathanasiadis@uth.gr; Tel: +30-24410-64792

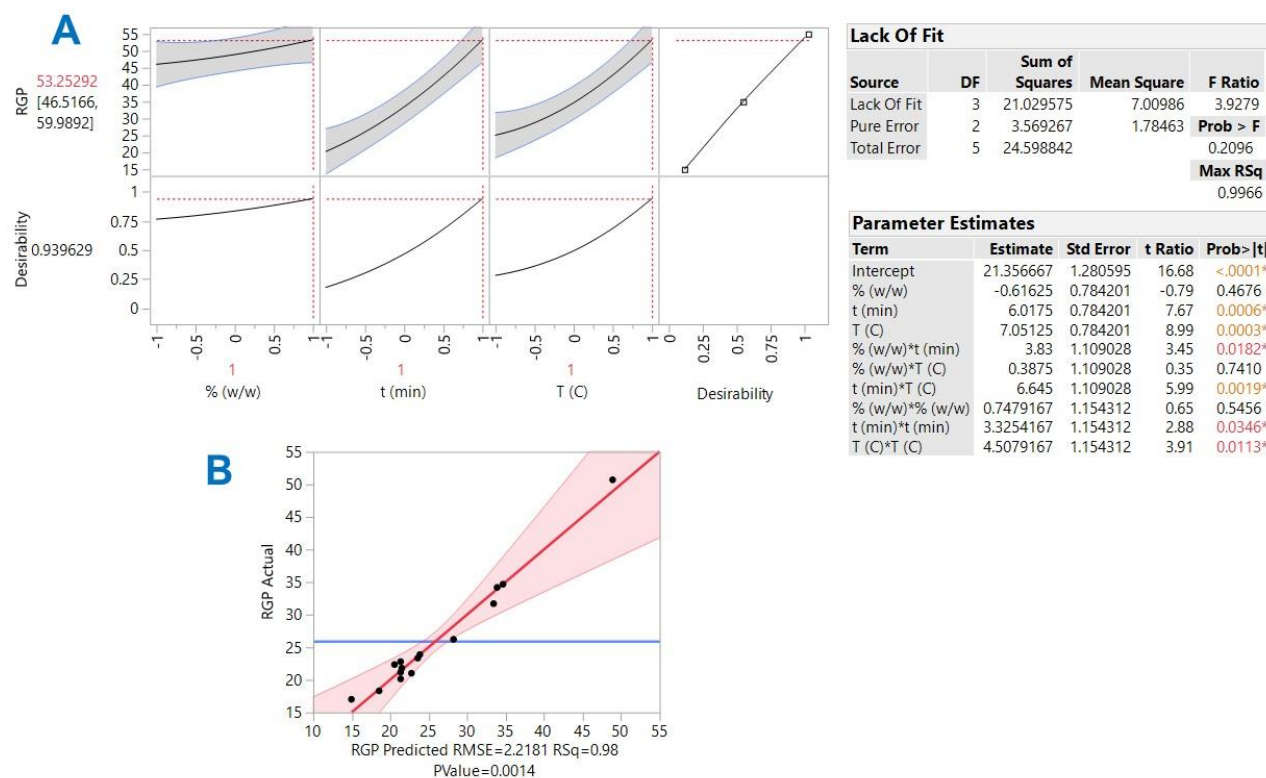

**Figure S1:** Desirability function (graph A), and plot of predicted vs actual values of the response ( $Y_{TP}$ ) (plot B), for the optimization of the extraction of RGP polyphenols performed with GL-CA-Pro. Inset tables provide statistics associated with the assessment of the model derived. Values with color and asterisk are statistically significant.

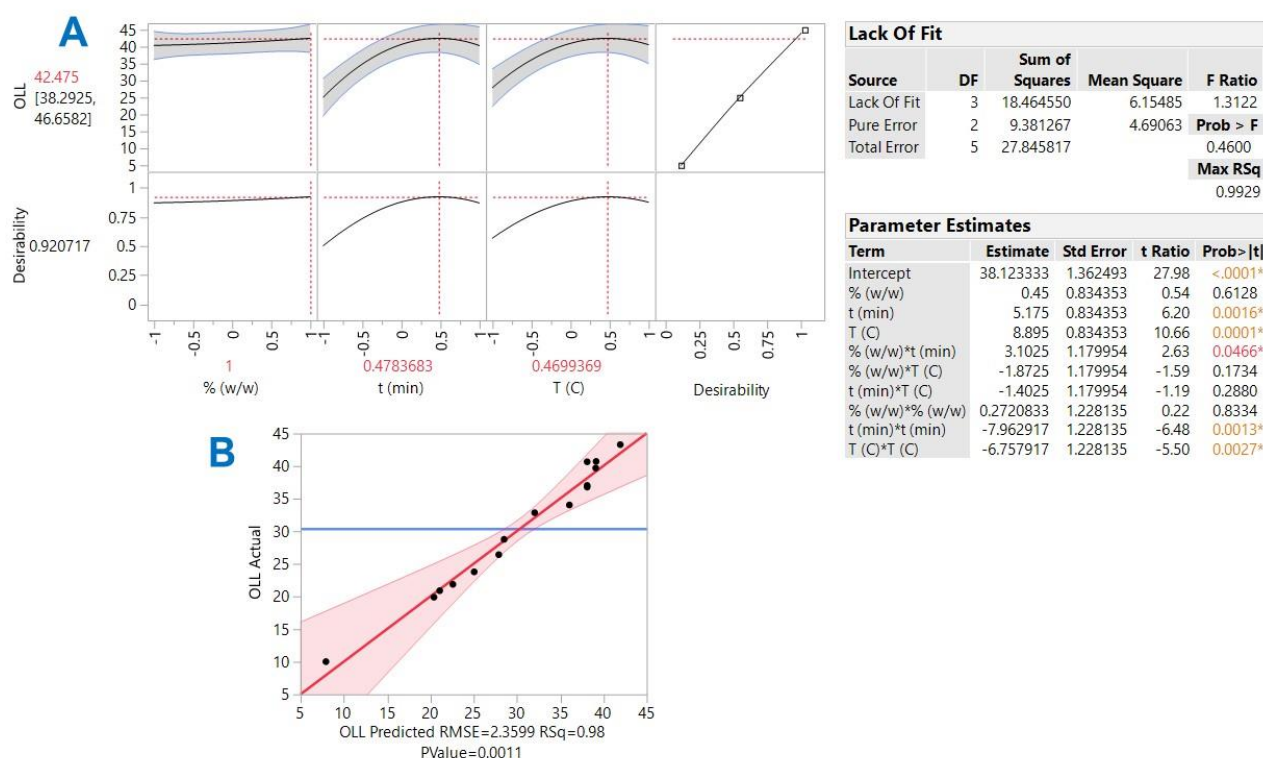

**Figure S2:** Desirability function (graph A), and plot of predicted vs actual values of the response ( $Y_{TP}$ ) (plot B), for the optimization of the extraction of OLL polyphenols performed with GL-CA-Pro. Inset tables provide statistics associated with the assessment of the model derived. Values with color and asterisk are statistically significant.
